# Supplementary material for: Elucidating the mechanism of densifying lignocellulosic biomass with acidic chemicals (DLC) for lignocellulosic biorefinery
Source: Royal Society of Chemistry journal article supplement (doi:10.1039/d3gc01703f), 2023-01-01
Supplement: d3gc01703f1.pdf [file d3gc01703f1.pdf]

## **Supplementary Figures and Tables**

### **Elucidating mechanism of Densifying Lignocellulosic biomass with acidic Chemicals (DLC) for lignocellulosic biorefinery**

Xinchuan Yuan, Guannan Shen, Sitong Chen, Wenyuan Shen, Xiangxue Chen,  
Shuangmei Liu, Mingjie Jin\*

School of Environmental and Biological Engineering, Nanjing University of Science  
and Technology, 200 Xiaolingwei Street, Nanjing 210094, China.

\* Corresponding author. Email: [jinmingjie@njust.edu.cn](mailto:jinmingjie@njust.edu.cn)

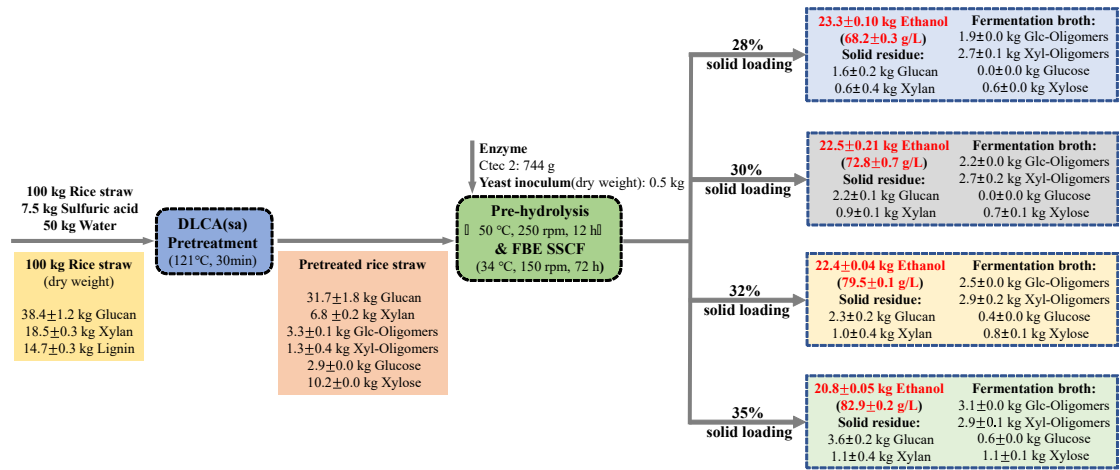

Fig. S1. Mass flow of glucan and xylan during DLCA(sa) pretreatment and SSCF for ethanol production. The mass balances were conducted based on 28%-35% solid loadings.

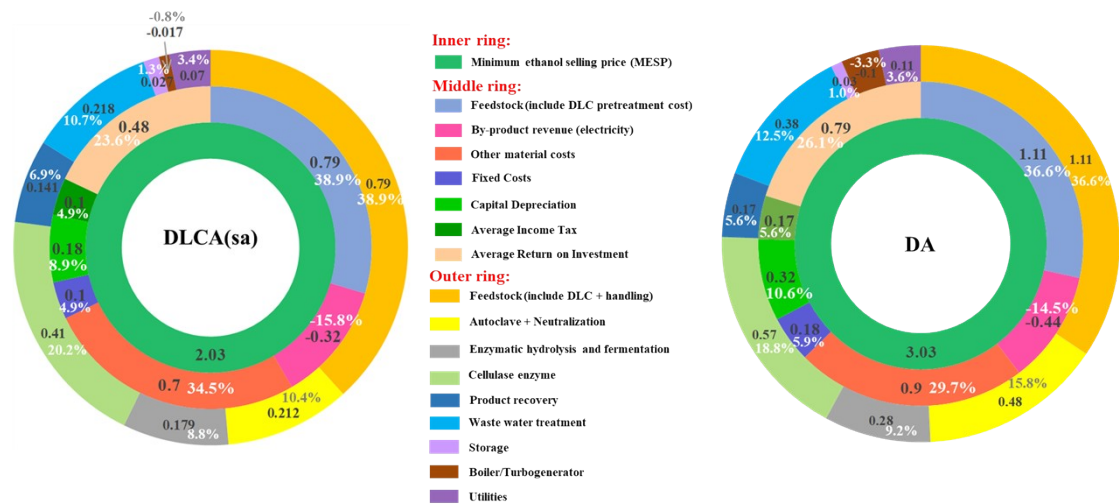

Fig. S2. Techno-economic analysis for the ethanol production from DLCA(sa) pretreatment and DA pretreatment. The TEA was performed based on NREL model with modifications<sup>1</sup>. The black font represents the costs of the component, unit is US\$/per gallon, the white/gray font represents the relative contribution of the components of the MESP. TEA data related to DA pretreatment was adopted from previous publication<sup>2</sup>.

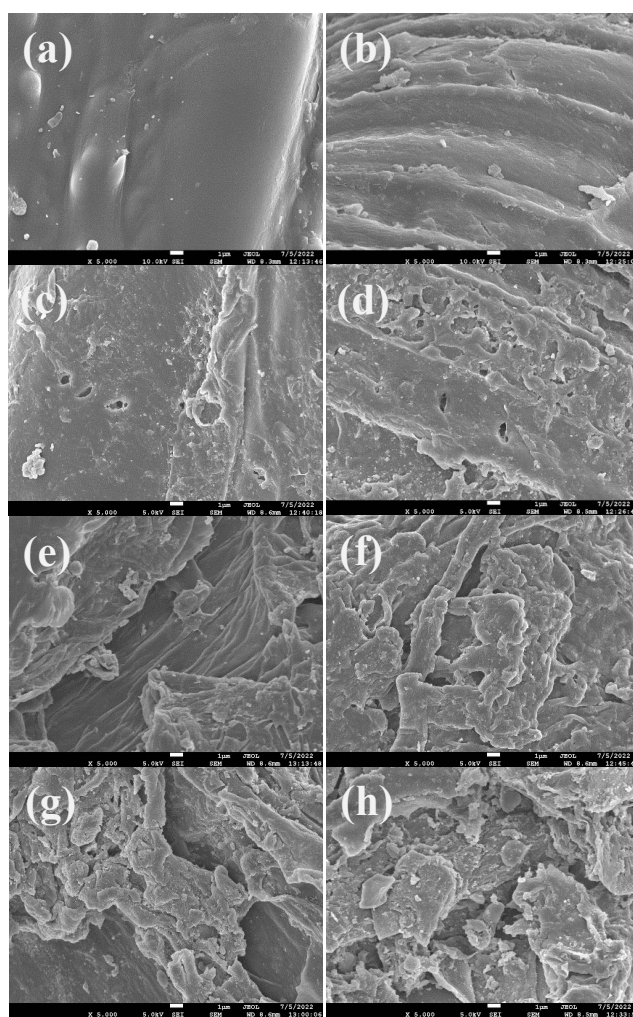

Fig. S3. SEM images of untreated RS (a), mDRS (b), DLC\*-RS 20 °C (c), DLC\*-RS 70 °C (d), DLC-RS (e), DLCA\*-RS (f) DLCA-RS (g) and DA-RS (h). DLC\* 20 °C/70 °C: DLC treatment by laboratory pelleting device under the temperature of 20 °C/70 °C.

Table S1 The information of all chemicals used in this study

| Chemical reagent         | Purity       | Manufacturer                                             |
|--------------------------|--------------|----------------------------------------------------------|
| Sulfuric acid            | AR, 95%-98%  | Sinopharm Chemical Reagent Co., Ltd                      |
| Calcium hydroxide        | AR, 95%      | Sinopharm Chemical Reagent Co., Ltd                      |
| D-glucose                | GC, ≥99.5%   | Aladdin Reagent (Shanghai) Co., Ltd.                     |
| D-xylose                 | AR, 98%      | Aladdin Reagent (Shanghai) Co., Ltd.                     |
| Avicel®PH-101            | AR           | Sigma-Aldrich Co., Ltd.                                  |
| Citric acid              | T, ≥99.5%    | Shanghai Macklin Biochemical Co., Ltd.                   |
| Sodium citrate dihydrate | AR, 99%      | Shanghai Yuanye Bio-Technology Co., Ltd.                 |
| Ethanol                  | HPLC, ≥99.8% | Aladdin Reagent (Shanghai) Co., Ltd.                     |
| Glycerol                 | AR, 99%      | Shanghai Macklin Biochemical Co., Ltd.                   |
| 5- Hydroxymethylfurfural | AR, 99%      | Aladdin Reagent (Shanghai) Co., Ltd.                     |
| Levulinic acid           | AR, 99%      | Shanghai D&B biological science and technology Co., Ltd. |

|                                   |                     |                                        |
|-----------------------------------|---------------------|----------------------------------------|
| Furfural                          | GC, $\geq 99.5\%$   | Aladdin Reagent (Shanghai) Co., Ltd.   |
| Formic acid                       | HPLC, $\geq 98\%$   | Aladdin Reagent (Shanghai) Co., Ltd.   |
| Acetic anhydride                  | AR, 98.5%           | Sinopharm Chemical Reagent Co., Ltd.   |
| Deuterated dimethyl sulfoxide     | 99.90%              | Cambridge Isotope laboratories, Inc.   |
| Direct Red 28                     | BS                  | Shanghai Macklin Biochemical Co., Ltd. |
| Yeast Extract                     | AR, 99%             | Thermo Fisher Oxoid Co., Ltd.          |
| Tryptone                          | AR, 99%             | Thermo Fisher Oxoid Co., Ltd.          |
| Copper ethylenediamine hydroxide  | AR, 98%             | Acros Organics co., Ltd.               |
| Chicago Sky Blue 6B (Birect Blue) | BS                  | Nanjing Duly Biotech Co., Ltd.         |
| Pyridine                          | AR, 99%             | Shanghai Macklin Biochemical Co., Ltd. |
| Tetrahydrofuran                   | AR, 99%             | Aladdin Reagent (Shanghai) Co., Ltd.   |
| 1,4-Dioxane                       | AR, 99%             | Aladdin Reagent (Shanghai) Co., Ltd.   |
| Vanillin                          | AR, 99%             | Aladdin Reagent (Shanghai) Co., Ltd.   |
| Sodium carbonate                  | GR, $\geq 99.9\%$   | Shanghai Macklin Biochemical Co., Ltd. |
| Tetrahydrofuran                   | AR, 99%             | Aladdin Reagent (Shanghai) Co., Ltd.   |
| Methyl alcohol                    | HPLC, $\geq 99.9\%$ | Aladdin Reagent (Shanghai) Co., Ltd.   |

Table S2 Detailed experimental parameters of various acid pretreatments

| Experimental parameter chart | Type of treated biomass | Treat temperature | Treat time | Biomass loading of pretreatment (w/w) | Sulfuric acid dosage (g/g RS) | sulfuric acid conc. (g/L) |
|------------------------------|-------------------------|-------------------|------------|---------------------------------------|-------------------------------|---------------------------|
|                              | DLC(sa)-RS              | RT                | 3 days     | 75%                                   | 0.075                         | 209.3                     |
|                              | DLCA(sa)-RS             | 121 °C            | 30 min     | 25%                                   | 0.075                         | 23.3                      |
|                              |                         | 121 °C            | 60 min     | 10%                                   | 0.05                          | 5.6                       |
| Figure 1                     | DA-RS                   | 142 °C            | 12 min     | 8.3%                                  | 0.145                         | 13.2                      |
|                              |                         | 160 °C            | 10 min     | 9.1%                                  | 0.11                          | 11                        |
| Figure 2a-b                  | CA-RS                   | RT                | 3 days     | 75%                                   | 0.075                         | 209.3                     |

|             |                               |        |        |     |       |       |
|-------------|-------------------------------|--------|--------|-----|-------|-------|
|             | CA-mDRS                       | RT     | 3 days | 75% | 0.075 | 209.3 |
|             | (CA+DA)-RS                    | 121 °C | 30 min | 25% | 0.075 | 23.3  |
|             | (CA+DA)-mDRS                  | 121 °C | 30 min | 25% | 0.075 | 23.3  |
|             | CA(70 °C 10 min)-<br>mDRS     | RT     | 3 days | 75% | 0.075 | 209.3 |
|             | (CA(70 °C 10<br>min)+DA)-mDRS | 121 °C | 30 min | 25% | 0.075 | 23.3  |
| Figure 2c-d | DA-DRS                        | 121 °C | 30 min | 25% | 0.075 | 23.3  |
|             | D-DARS                        | 121 °C | 30 min | 25% | 0.075 | 23.3  |
| Figure 3&4  | DLC*-RS                       | RT     | 3 days | 75% | 0.075 | 209.3 |
|             | DLC*-mDRS                     | RT     | 3 days | 75% | 0.075 | 209.3 |
|             | DLCA*-RS                      | 121 °C | 30 min | 25% | 0.075 | 23.3  |
|             | DLCA*-mDRS                    | 121 °C | 30 min | 25% | 0.075 | 23.3  |

Table S3. Schemes of biomass addition and enzyme addition for SSCF process

| Process operation                | Solid loading<br>(w/w) | Process time |     |     |     |     |
|----------------------------------|------------------------|--------------|-----|-----|-----|-----|
|                                  |                        | 0h           | 12h | 24h | 36h | 48h |
| Biomass addition<br>(w/w)        | 28%                    | 15%          | 5%  | 4%  | 4%  | -   |
|                                  | 30%                    | 15%          | 5%  | 5%  | 5%  | -   |
|                                  | 32%                    | 15%          | 5%  | 4%  | 4%  | 4%  |
|                                  | 35%                    | 15%          | 5%  | 5%  | 5%  | 5%  |
| Enzyme addition<br>(mg/g glucan) | 28%                    | 4            | 4   | 4   | 4   | 4   |
|                                  | 30%                    | 4            | 4   | 4   | 4   | 4   |
|                                  | 32%                    | 4            | 4   | 4   | 4   | 4   |

|       |     |    |   |   |   |   |
|-------|-----|----|---|---|---|---|
| ..... | 35% | 10 | 4 | 2 | 2 | 2 |
|-------|-----|----|---|---|---|---|

Table S4. Typical degradation inhibitors and their contents in pretreated RS

| Type of Pretreatment | Content of inhibitors (mg/g pretreated biomass) |                |           |           |             |           |           |
|----------------------|-------------------------------------------------|----------------|-----------|-----------|-------------|-----------|-----------|
|                      | Formic acid                                     | Levulinic acid | Furfural  | HMF       | Acetic acid | Phenols   |           |
| 121°C 60min          | 1.91±0.05                                       | 0.23±0.02      | 0.02±0.00 | 0.07±0.02 | 3.47±0.18   | 2.07±0.14 |           |
| Dillute acid (DA)    | 142°C 12min                                     | 2.14±0.04      | 1.08±0.05 | 0.09±0.01 | 0.19±0.01   | 5.22±0.20 | 6.15±0.29 |
|                      | 160°C 10min                                     | 4.58±0.28      | 2.80±2.08 | 0.11±0.02 | 0.46±0.04   | 7.46±0.27 | 9.45±0.20 |
| DLCA(sa)             | 1.47±0.06                                       | 0.18±0.04      | 0.00±0.00 | 0.17±0.02 | 8.81±0.62   | 2.94±0.32 |           |

Table S5. Relative changes of functional groups/chemical bonds for pretreated biomass

| Bond position<br>(cm <sup>-1</sup> ) | Assignment                                            | %Relative change of UT/pretreatd biomass |                    |                    |            |            |             |
|--------------------------------------|-------------------------------------------------------|------------------------------------------|--------------------|--------------------|------------|------------|-------------|
|                                      |                                                       | UT-RS                                    | DLC*-mDRS 20<br>°C | DLC*-mDRS 70<br>°C | DLC(sa)-RS | DLCA*-mDRS | DLCA(sa)-RS |
| 3340                                 | O–H stretching of cellulose hydrogen bonds            | -                                        | 7.25               | 11.70              | 15.92      | 31.05      | 34.42       |
| 2916                                 | C–H stretching of methyl/methylene in cellulose       | -                                        | 4.67               | 10.74              | 7.20       | 16.19      | 15.01       |
| 1720                                 | Carboxylic acids/ester groups                         | -                                        | 6.71               | 7.62               | 8.33       | 10.62      | 10.58       |
| 1240                                 | C–O adsorption of acetyl groups                       | -                                        | 14.26              | 17.47              | 19.56      | 28.46      | 34.28       |
| 898                                  | Related to amorphous cellulose                        | -                                        | 3.69               | 8.36               | 6.03       | 15.17      | 16.27       |
| 1098/898                             | Ratio of amorphous cellulose to crystalline cellulose | 0.83                                     | 0.86               | 0.89               | 0.89       | 0.9        | 0.91        |

%Relative change = 100\*(intensity of UT-RS – intensity of pretreated RS)/intensity of UT-RS; where positive number indicates reduction.

Table S6. Subpeaks of C1s and O1s from XPS analysis for untreated and treated RS

| Samples     | C1s                  |                      |                      | O1s                  |                      |                      |
|-------------|----------------------|----------------------|----------------------|----------------------|----------------------|----------------------|
|             | C1(%)<br>(~284.7 eV) | C2(%)<br>(~286.6 eV) | C3(%)<br>(~288.4 eV) | O1(%)<br>(~531.3 eV) | O2(%)<br>(~532.4 eV) | O3(%)<br>(~533.3 eV) |
| LRS         | 67.49                | 23.96                | 8.55                 | 13.89                | 67.24                | 18.87                |
| DLC(sa)-RS  | 61.95                | 29.72                | 8.33                 | 11.61                | 66.66                | 21.73                |
| DLCA(sa)-RS | 61.53                | 28.55                | 9.92                 | 11.03                | 62.89                | 26.08                |
| DA-RS       | 73.48                | 21.92                | 4.6                  | 4.11                 | 55.05                | 40.84                |

Subpeaks in C1s correspond to C1 (C-C), C2 (C-OH or C-O-C) and C3 (O-C-O or C=O), respectively. Subpeaks in O1s correspond to O1 (O-C=O and Ar-O-Ar), O2 (C-O-, C=O, C-O-C and O-C=O), O3 (Ph-O), respectively.



1. R. D. D. Humbird, L. Tao, C. Kinchin, D. Hsu, A. Aden, P. Schoen, J. Lukas, B. Olthof, M. Worley, D. Sexton, D. Dudgeon, *National Renewable Energy Laboratory, Golden, CO*, 2011.
2. J. Yu, Z. Xu, S. Chen, Y. Yu, C. Zhang, X. Chen and M. Jin, *Fuel*, 2021, DOI: 10.1016/j.fuel.2021.122603, 122603.
